# Supplementary material
Source: MDPI journal article supplement (https://www.mdpi.com/2071-1050/12/24/10657)
Supplement: s1 [file s1]

**Annex.** Validated Scale of the three Levels of Digital Identity in active older-adults

|                                   |                                                                                         | <i>Level of Agreement: from 1 = completely disagree to 5 = completely agree.</i> |   |   |   |   |
|-----------------------------------|-----------------------------------------------------------------------------------------|----------------------------------------------------------------------------------|---|---|---|---|
| Level 1. Subscale of Location     | 1. Being on the Internet is a rewarding process.                                        | 1                                                                                | 2 | 3 | 4 | 5 |
|                                   | 2. The Internet seems to me a cozy place.                                               | 1                                                                                | 2 | 3 | 4 | 5 |
|                                   | 3. I enter, I go out, and I am on the Internet as if I were "at home"                   | 1                                                                                | 2 | 3 | 4 | 5 |
|                                   | 4. On the Internet, there are already many familiar sites, with which I feel identified | 1                                                                                | 2 | 3 | 4 | 5 |
|                                   | 5. When I am on the Internet I have the feeling of "being there"                        | 1                                                                                | 2 | 3 | 4 | 5 |
| Level 2. Subscale of Action       | 6. The Internet allows me to have or expand relationships/friendships                   | 1                                                                                | 2 | 3 | 4 | 5 |
|                                   | 7. When I am connected I have the feeling of being part of a group                      | 1                                                                                | 2 | 3 | 4 | 5 |
|                                   | 8. The Internet makes it easier for me to exchange experiences, ideas, and emotions     | 1                                                                                | 2 | 3 | 4 | 5 |
|                                   | 9. I like to share information on the Internet                                          | 1                                                                                | 2 | 3 | 4 | 5 |
|                                   | 10. When I am on the Internet I do not feel alone                                       | 1                                                                                | 2 | 3 | 4 | 5 |
| Level 3. Subscale of Significance | 11. Internet connection is a necessity                                                  | 1                                                                                | 2 | 3 | 4 | 5 |
|                                   | 12. I feel linked to the Internet                                                       | 1                                                                                | 2 | 3 | 4 | 5 |
|                                   | 13. I find calm being connected                                                         | 1                                                                                | 2 | 3 | 4 | 5 |
|                                   | 14. I want to spend time connected to the Internet                                      | 1                                                                                | 2 | 3 | 4 | 5 |
